# Supplementary material for: Melatonin Mitigates the Infection of Colletotrichum gloeosporioides via Modulation of the Chitinase Gene and Antioxidant Activity in Capsicum annuum L
Source: MDPI journal article supplement (doi:10.3390/antiox10010007), 2020-12-23
Supplement: s1 [file s1]

# Melatonin Mitigates the Infection of *Colletotrichum gloeosporioides* via Modulation of the Chitinase Gene and Antioxidant Activity in *Capsicum annuum* L.

Muhammad Ali <sup>1,2</sup>, Anthony Tumbek Lamin-Samu <sup>1</sup>, Izhar Muhammad <sup>3</sup>, Mohamed Farghal <sup>1</sup>, Abdul Mateen Khattak <sup>4</sup>, Ibadullah Jan <sup>5</sup>, Saeed ul Haq <sup>4</sup>, Abid Khan <sup>6</sup>, Zhen-Hui Gong <sup>2,\*</sup> and Gang Lu <sup>1,\*</sup>

<sup>1</sup> Department of Horticulture, College of Agriculture and Biotechnology, Zhejiang University, Hangzhou 310058, China; alinhorti@yahoo.com (M.A.); anthonylaminsamu@yahoo.com (A.T.L.-S.); mohamedfa2016@gmail.com (M.F.)

<sup>2</sup> College of Horticulture, Northwest A&F University, Yangling 712100, China

<sup>3</sup> College of Agronomy, Northwest A&F University, Yangling 712100, China; izeyaar@gmail.com

<sup>4</sup> Department of Horticulture, The University of Agriculture, Peshawar, Pakistan; mateen@aup.edu.pk (A.M.K.); saeed\_ulhaq@nwsuaf.edu.cn (S.u.H.)

<sup>5</sup> Department of Agriculture, University of Swabi, Khyber Pakhtunkhwa, Pakistan; dribad@uoswabi.edu.pk

<sup>6</sup> Department of Horticulture, The University of Haripur, Haripur 22620, Pakistan; abidagriculturist@gmail.com

\* Correspondence: zhong@nwsuaf.edu.cn (Z.-H.G.); glu@zju.edu.cn (G.L.)

**Table S1. The CDS sequence of chitin-binding protein gene family with accession number**

|                                                                                                                                                                                                                                                                                                                                                                                                                                                                                                                                                                                                                                                                                                                                                                                                                                                                                                                                                                                                                                                                                                 |
|-------------------------------------------------------------------------------------------------------------------------------------------------------------------------------------------------------------------------------------------------------------------------------------------------------------------------------------------------------------------------------------------------------------------------------------------------------------------------------------------------------------------------------------------------------------------------------------------------------------------------------------------------------------------------------------------------------------------------------------------------------------------------------------------------------------------------------------------------------------------------------------------------------------------------------------------------------------------------------------------------------------------------------------------------------------------------------------------------|
| <b><i>CaChi1</i> (Capana07g001653)</b>                                                                                                                                                                                                                                                                                                                                                                                                                                                                                                                                                                                                                                                                                                                                                                                                                                                                                                                                                                                                                                                          |
| ATGAAGCTTTGTGAATTCACAGCTCTTTCTTTGTTACTTTCTCTCCTATTGCTAGCTGCATCGGCA<br>GAACAATGTGGTAAGCAGGCGGGAGGTGCACGTTGTGCCCTGGACTCTGTTGCAGCAAAATTG<br>GCTGGTGTGGTAATACTAATGTCTATTGTGGTCCTGGAAATTGTCAAAGTCAGTGTCTTCGGGT<br>CCCTCTCCGAAGCCACCAACCCCTGGTCCTCGTCCTGGTGGGGACATCAGTGGTGTATCTCAA<br>ATTCTATGTTTGATCAAATGCTTAAGCATCGCAATGATAATGCATGTCAAGGAAAGGGTAATTT<br>CTACAGTTACAATGCCTTCATCAGTGCTGCCAGGTCTTTTCGTGGCCTTTGGTACCACTGGTGATA<br>CCACTGCCCCGAAAAAGAGAAATTGCTGCTTTCTTTGCCCAAACCTCCCATGAAACTACCGGAGG<br>ATGGCCTACAGCCCCTGATGGACCATATGCATGGGGATACTGCTTCCTTAGAGAACGAGGTAGC<br>CCCGGGGACTACTGTACACCAAGTGGTCAATGGCCTTGTGCTCCTGGAAGAAAATACTTCGGAC<br>GAGGTCCCATTCAAATCTCACACAATTACAACATATGGGCCATGTGGAAGAGCCATCGGAGTTGA<br>CCTTTTAAACAATCCTGATTTAGTTGCCACAGATCCAGTCATCTCATTCAAATCAGCTATCTGGT<br>TCTGGATGACCCCTCAATCACCAAAGCCTTCTTGCCACGATGTCATCATTGGAAGATGGCAACC<br>ATCCAGCGCTGACCGAGCAGCCAACCGCCTCCCTGGATTTCGGCGTCACCACAAACATCATTAAT<br>GGTGGCTTGAATGTGGTCATGGTAATGACAATAGGGTCCAGGATCGGATTGGGTTTTATAGGA<br>GGTATTGTGGAATTCTTGAGTTAGCCCAGGTAACAATCTTGATTGCGGCAATCAGAGATCTTTT<br>GGCAATGGACTCTTAATCGATTCTATGTAA |
| <b><i>CaChi2</i> (Capana10g001143)</b>                                                                                                                                                                                                                                                                                                                                                                                                                                                                                                                                                                                                                                                                                                                                                                                                                                                                                                                                                                                                                                                          |
| ATGAAGCTTTGTAAATTCACAGTTCTTTCTTTACTATTTTCTCTCCTATTTCTAACTGTCTCGACA<br>GAACAATGTGGTAAGCAGGCGGGAGATGCACGTCGTGCCCGGACTCTGTTGCAATAAATTG<br>GCTGGTGTGATAACACTAATGTCTATTGTGGTCCTGGAAATTGTCAAAGCCAATGTCCTTCTGGT<br>CCCACTCCGAAGCCACCTACCCCTGGCCCTCGTCCTGGTGGGGACATCAGCGGTGTAATCTCAA<br>ATTCTGTGCTTGATCAGATTCTTAAGCATCGCAATGATAATGCCTGTCGAGGAAAGGGTAATTT<br>CTACAATTACAATGCCTTCATCAATGCTGTCAAGGTCTTTTGTGGCCTTTGGTACCACTCGTGATA<br>TCATTGTACGAAAAAGGGAATTGCTCAAACCTCCCATGAAAGTACCGGATGGCCTACAGCACC<br>TGACGGACCACATGCATGGGGTTACTGCTTCCTTAGAAAACGAGGTAGCCCCGGCGACTACTGT<br>TCACCAAGTGGTCAATGGCCTTGTGCTCCTGGAAGAAAATATTTTTGA                                                                                                                                                                                                                                                                                                                                                                                                                                                                               |
| <b><i>CaChi3</i> (CA10g09850)</b>                                                                                                                                                                                                                                                                                                                                                                                                                                                                                                                                                                                                                                                                                                                                                                                                                                                                                                                                                                                                                                                               |
| ATGAGGCTAAGTGAATGGACAATTTTTTCTTACTATTTGCTCTCTTATTGCTGATGGCCTCGGC<br>AGAACAATGTGGTTCTCAGGCAGGAGGTGCACTTTGTCCCTCAGGACTCTGTTGTAGCAAATAT                                                                                                                                                                                                                                                                                                                                                                                                                                                                                                                                                                                                                                                                                                                                                                                                                                                                                                                                                            |

GGCTGGTGTGGTGACACCGATGCCTATTGTGGTCCTGGCAATTGTCAAAGCCAGTGTCTGGCA  
GTCCCTCTCCCAAACCACCTACCCCTGGCCCCGGTCCTAGTGGGGACATCGGTGGTGTCTCTCA  
AATTCCATGTTTGACCAGATGCTTAAGCATCGCAATGATAATGCTTGTCAAGGAAAGAACAATT  
TCTACAATTACAATGCCTTCATTAATGCTGCAAGGTCTTTTCCCGTCTTTGGCACCCTGGCGAT  
ACCACTGCCCCGTAAGGGGAAATTGCTGCTTTCTTTGCCCAAACCTCCCATGAACTACTGGTA  
GGTCAATTTTAATTTGA

***CaChiIII1 (Capana03g000778)***

ATGATGAGAACTAGAGAGACAGCAATTAGTCTTTTGATTCTTGCTTTGTTCTCCTTAATGTCTC  
TGCCTATTTATCTCTTCCCTTTTCATCTTCCAACCAATAATGAAACCTTTGGCCTTGAATCATACCC  
ACAAGGACGATGTGGAAGACAAGCTGGTGGTACAAAATGTCTACTGGAGCATGTTGTAGTAT  
ATCTGGTTGGTGTGGAACCACATCAGACTATTGTACTCCTAGAAAGTGTCAAAGTCAATGTGTT  
TTTCCACCCCCACCATCATATCCAGAAGGACGATGCGGAGAACAACCTTCTTTTAAAAGATCAT  
GTCCTTCTGGACAGTGTGTCAGTATAGCTGGTTGGTGTGGAAGCACAGGAGCCTATTGTAATCC  
TGGTTGGTGTCAAAGTCAGTGCAAAACTATAACCTCGCCCAACCAAGAATCGCATGAGAGGCATT  
GAAAGCTTCCTGCTCAATGCTCTCTAG

***CaChiIII2 (Capana03g000780)***

ATGGAGTTTGTGTAGTATCTACGGCTGGTGTGGAACCACATCAGACTATTGTTCCCCTGGAAG  
ATGGTCAGAGTCAATGTCCAGACCCGTACCCAGAGGGACGATGCGGATGGCAAGCTGGTGGTA  
AACTATGTCTAATGGAGCGTGCTGTAGTTACAGTGGTTGGTGTGGAACAGCACGACTCTCTTG  
TAGAACTGATTTCTGTCAAAGCCAATGTGCAACCCCGTTCCACGGGGACGATGGGGATGGCAA  
GCTGCTGGTAGAGGATGTCCTAATGGAGTGTGTTGTAGTGTCTCTGGTTGGTGTGGAACACAT  
CAGACTATTGTGCTCCCGATAAATGTCAAAAACAATGTAAACACCATTCCCACCCCCACCTTC  
ACCCTCACCTCCACCTCCACCTCCACCTAATTTCCACACGAGGACGATGCGGAAGGCAAGCTGGT  
GGTAGATTATGTCCTAAGCGAAAGTGTTGTAGTAGATGGGGTGGTGTGGAACACGCCAGAAT  
ATTGTGCTGATAAAAATTGTCAAAGTCAGTGCAAAATTATCTAACCTCATCCGCCAAGAATGA  
TATGGGAGGTCTTGGAAGCTTCTAG

***CaChiIII3 (CA03g30170)***

ATGATGAAAGCTAAAAAGACAAATGATGCATTCTCAGTTAGCTTTTTGGCTCTGGCTTTGTTCT  
CTTAGCAATAATTTATAAGGCCTCAGCCTACAATCTCTCTCTTCCCTCTGCTAAAAATCCTGAAG  
GTCGACGACGACAGTGTGGTTGGGAAGGTTGCTATGAAGATTGTCCCCCTGGATCATGTTGTAA  
CTGGGACGGTATTTGCGGAAATACAGAAGATTATTGTGGCAGATCGTTCTGTCAAAAACAATGT  
CCACCTCCACCCCCACTTGACCTCCACCTCCAAACCCACCTGGACGATGTGGATGGCAAGCTT  
ATGGTACTAAGTGTCTCTCTGGATTGTGTTGTAGTACATCTGGTTGGTGTGGATCCACTGAAAAA  
TATTGCGCCAAAGGGCGTTGTCAAAGTCAGTGCAAAAGTACTCTTACCCCTCATAATAATCCAA  
TAATAGGTAAAGCGAGAGTGTGGATACCAAGGTTGCTACAAACTATGTCCTCTGGATCGTGCTG  
TAGCTGGTTGGGTTGGTGTGCGAACTACAGAAAAGTACTGCAGTCCAAAGAAGTGTCAAAGCCA  
ATGTCCACCTATACCCCCACCTCCACCTCCACCTCCATACGCACCTGGACGATGTGGAAGGCAA  
GCTGATGGTAGAAAAATGTCTCTCTGGATTGTGCTGTAGTGCATCTGGTTGGTGTGCGAACCACAA  
AATTCTATTGCGCCAAAGAGTGGTGTCAAAGTCAGTGCAAGAGTACTACTCTTGCCTCGTCTATT  
ATTAAGAGCTTGTTGCTCGACGGTACGGTTTCTAGCTAG

***CaChiIII4 (CA03g30180)***

ATGCAAGCTGGTGGAACAAAATGTCCTCCAGGATTGTGTTGTAGTTTATCTGGTTGGTGTGCGGAG  
CCACAGAAGAGTATTGCCGCGAAGGGTGGTGTCAAAGCCAGTGCAAGAGTAATCTTACCCCTC  
ATAATAATTCATAATGGCTAAACGAGAGTGCGGATACCAAGGTTGCTATAAAAAATGTCCTCC  
TGGATCGTGTTGTAGCAGGTGGGGTTGGTGTGCGAACTACAGAAGAGTTTTGCACTAAATACTTC  
TGTCAGATCAATGTGCGCCTCCACCTGCACCTCCACCTCCACCTCCATACGCACCTGGAAGAT  
GTGGAATGCAAGCTGATGGTAGAAAATGTCTCTCTGGATTGTGTTGTAGTTCATCTGGTTGGTG  
CGGAACCACAAAACACTATTGCGCCAAAGAGTGGTGTCAAAGTCAGAGCAAGAGTACTACTCT  
TACCTCGTTTGTATTGAAAGCTTGTTGCTCAATGGTACGGTGTCTAGCTAG

***CaChiIII5 (CA03g30190)***

ATGAGAGAGATTATAATTAGCCTTTTAGCTCTGGCATTGTTCTCCTTAAGGTCTCAGCCAAGCT  
ATCTGATGTTCCCTTTTATTTGCCAGCCAATGAAACATTTGGCCTTGAACATAAAGGGAACGTA  
ATACGTCAGACCTAGCCCAGTCATTATTAGCACGGAGTCGATGCGGATGGCCAGCTGGCGGTAG  
ATGGTGTCCAGAAGGACAGTGTGTAATTTTATGTTGGTGTGGAACCACAAGTGCCTATTGT

GGTGAAAATATGTGTGATTTCCAGTGTCCAGGTCCGATCCGAGTGAGACGATGCGGAATGCAAG  
CTGGTGGTCGTCATGTCTACTGGACAATGTTGTCGGGACACAGTCTCTCTGGTTGGTGTGGAA  
CCACTTCAATCTATTGTTCTCGTGAAGAATGTCAAAGTCAGTGAGAAAGGCCACCACCACCCCC  
GTCTCCACCACCCCCACCCCCACCATTCCCACAGGGACGATGCGGAAAGCAAGCTGCTGGTAGA  
GCATGTCTACTGGAGTGTGCTGTAGTATATGGGGCTGGTGTGGAACCACACGTAACCTATTGTG  
GTTCTCCCTACTGTCAAAGTCAGTGCAAGGGCGGTCTAA

***CaChiIII6 (Capana07g001180)***

ATGAGAGGAAGCAGTGCATTAGTTAGCCTTTTATCTCTGGTTTTGTTGTTCTCCTTGAGGTCTC  
GGCCAATCCATCTCATCCCATTCAATTTGCCGGCCAATGAAACGATCCTTGCCAGCTTGAACCTA  
GCCGAGGGGGAGGGACAATGCGGAAAACAAGGTGATGGTAAAGAATGTCCTAGTGAAGAGTG  
TTGTAGTTACTGGGGTTGGTATGGAACCGGACCAGCTTACTGTGCTTCTGAAACCTGTCAAAGT  
CAATGCCAAGAGCCAGAAGAGCCAGGTTTATGCGGAATACAAGGTGGTGGTAAAAAATGTCCT  
AGTGGACAGTGTGTACTGTATTTGTTTGTGTACAGCAGCATCAGATATGTGTGAGCATTTTGTG  
TCAAAGTCAGTGCCCAACTACTCTAAAGAAGAACAGCATGAGAGGCATTCAAAGCTTCTTCATC  
AATGCTCTCTAA

***CaChiIII7 (Capana07g001181)***

ATGAAAGAACTGCATTAATTAGCGTTTTAGCTCTAGCTTTATTCCTCCTTAAGGTCTCAGCCAA  
AACATCTCTTCCCTTTCATTTGTCAGACAGTTCAGCATCATCATCAGCCAAGCTATCAGGCT  
TACCGACCTATGCGGAGAAGCTGTTGGTGGTAGAGAATGCCCTGATGGGAAGTGTTGTAGTCT  
AGAGGGTTATTGTGGAACAGGAGAAGCCTACTGTGCTCCTGAAAACCTGTCAAAGTAATTGCGAT  
GAGCCACCAGAGCCAGAGCTAGAATGCGGAGATCAAGCTGGTGGTAAAGAATGTCCTAATGGA  
GAGTGTTGTAGTATATTTGGTTCGTGTGGAACCACAGAAGACCATTGTTGGAAACCTTTTTGTCA  
AAGTCAGTGCAATGAGCCACCATTGCCACCAGAGCCAGAGAGATGCGGAAGGGAAGGTGGTGG  
TAAAGAATGTCCTACGGGAGAGTGTTGTAGTGTATTTGGTTCCTGTGGAACCACAGAAGAACAT  
TGTGAGGAACCTTTTTGTGAGAGTCAGTGCAAACACTAGTCTAAACAAGAATCGCATGCTGAGAG  
GCACTCGAAGCTTCTTCCTCAATGCTCTCTAA

***CaChiIV1 (CA00g54030)***

ATGAACCTCTCTTCATCAACAAAATATTTCTTTCTCTTTGTAGCATTAGCTATAATAGCTGATGT  
ACCAAGACTAATCTTGGCACAAAACCTGTGGGTGTGCAGCAAATTTATGTTGTAGCAAATGGGGT  
TATTGTGGAGAGGGAAAGGATTATTGTGGTGAAGGGTGTCAAGGGGGGCCATGTTTTAGTACTA  
CACCATCAGGCAATAATGGCGGTTCACTTCTGATATTGTATCTGATGCATTCTTTAATGGGATA  
GCTGATCAAGCCGCTTCTAATTGTGAAGGAAAAGGGTTTTATTCAAGGGATAAATTCTTTGAAG  
CTCTTAAATCTTATCCTAACTTTGGAACCTGTGGGTCTAATGATGACTCTAAACGTGAAATTGCT  
GCTTCTTTGCTCATGTACCCACGAAACCTGGCCACATGTGCTACATAAATGAGATAAATGGTC  
CATAGGCGCATTTGTGATGAGGACAACAAGAGTACCCTTGTGTATCAGGCAAGAATACTACTA  
TGGTCGAGGACCAATTCAACTATCATGGAACCTCAACTACGGACCTGCTGGAAAATCCATTGGA  
TTTGATGGCCTAAATGACCCTGACATAGTTGCAAGAGATGCTGTTATTTCTTCAAGACAGCATT  
GTGGTATTGGATGAACAATTGTCATTCATAATTACTTCTGGACAAGGTTTTGGTCCAACCTATTA  
GAGCTATTAATGGTAGACTTGAATGTGATGGTGGTAATCCTCAAACCTGTTGCTAGAAGGGTTGA  
GTATTACACTCAGTATTGTCAACAACCTGGTGTGATGCTGGGGATAATCTCACGTGTTAG

***CaChiIV2 (Capana06g002084)***

ATGTTGGCTCAGAATTGTGAGTGTGAAGAAGGATTGTGTTGTAGTAAATGGGGTTATTGTGGCA  
TTGGAAATGGTTATTGTGGAAAAGGCTGCCAAGGAGGGCCATGTTATTTTAATATTTACCAAAA  
ATATAATGTTAAGAGAGTTGCTGAAATTGTTACTGAATCATTCTTTAACGGGATTCTGATCAAG  
CTGATTCAAATTGTGAAGGCAAAGGTTTTTTCACAAGATCTGTGTTTCTTGAAGCTGTCAAGTGC  
TATCCTGAATTCGGGACTGTTGGTTCTTCTGATGATAATAAGCGCGAAATTGCTGCTTTCTTTGC  
TCATGTCACCCATGAGACTGGACAAATGTGCTACATAAATGAGATAAATGGTGCATCTAGGGAC  
TATTGTGATATGACAACTATTTGTACCCTTGTGTCTCTGGAAAGAATTATTACGGCCGAGGACC  
GATCCAACCTATCATGGAACCTCAATTATGGACCAGCCGGAAGCCATCGGATTTGATGGCCTA  
AATGATCCCGATATCGTAGCTAGAGATAGTCTTATATCATTCAAGACAGCCTTGTGGTACTGGA  
TGAATAATTGCCATTCTCTATTAACCTCTAGACAAGGTTTTCGGAGCGACAATTCGAACCATTAAT  
GGCCTTCTTGAGTGTAATGATGCCAATCCTGAGGCTGTTGCCAGAAGGGTTCAATATTACATCG  
AGTATTGCGAGCAACTTGGTGTAGACCCTGGGGATAATCTCTCTTGTAG

***CaChiVII (CA07g09480)***

|                                                                                                                                                                                                                                                                                                                                                                                                                                                                                                                                                                                                                                                                                    |
|------------------------------------------------------------------------------------------------------------------------------------------------------------------------------------------------------------------------------------------------------------------------------------------------------------------------------------------------------------------------------------------------------------------------------------------------------------------------------------------------------------------------------------------------------------------------------------------------------------------------------------------------------------------------------------|
| ATGAAGTTTCAGGTGGTAATTTTGGTGCTTTTGGCCTTGTTGTTAACCACAACAAGTGCTCAACA<br>ATGCGGAAGACAAGCTGGAGGGCGTGCCTGTGCAAACAGGTTGTGCTGCAGCCAATACGGGTT<br>CTGTGGTACGACTCGGGCATACTGTGGAGTTGGTTGCCAGAGTAATTGTGGCCGTTATGCCACT<br>GACACCACTGGCGAAGCTGAAAATGTTGACAATGATGAACACAAGAATAATGACGGTCCCAAC<br>TAA                                                                                                                                                                                                                                                                                                                                                                                                 |
| <b><i>CaChiVI2 (Capana08g001237)</i></b>                                                                                                                                                                                                                                                                                                                                                                                                                                                                                                                                                                                                                                           |
| ATGGAGAAGCTAAGTACTACTGCTCTTTTGTCTGCTTTGGTCCTCTTCATCATAGCCGCAGTTGC<br>AAACGCACAACAGTGTGGGAGGCAAAGGGGCGGAGCGGTATGCAGCGGGAGCTTGTGTTGCAG<br>CCAGTATGGTTGGTGTGGATCGACACCCGAATACTGTTACCTAGCCAAGGTTGTCAGAGCCAA<br>TGCGGTGGCAGTGTACCAACTCCAATCCAGGAGGAGGTGGGGCTAGCGCGCAAAATGTACGT<br>GCAACATATCATTTGTATAACCCGCAGAATGTTGGGTGGGACTTGAATGCGGTTAGTGCTTATT<br>GCTCTACTTGGGATGCTAATAAGCCTTTGGCCTGGAGGAGCAAGTATGGTTGGACTGCTTTCTGT<br>GGTCCTGTTGGACCTCGTGGTCGAGACTCATGCGGCAAGTGCTTAAGGGTGACAAACACACGCA<br>CAGGAGCTCAGACGATAGTGAGAATCGTGGATCAATGCAGCAATGGTGGACTAGATTTAGACG<br>TTAACGTTTTCCGTCAAATCGATACGGACGGAGTAGGAAATCAACGAGGCCACCTTATTGTGAA<br>CTACCAGTTTGTGATTGTGGTGATAACTGA                    |
| <b><i>CaChiVI3 (CA08g10220)</i></b>                                                                                                                                                                                                                                                                                                                                                                                                                                                                                                                                                                                                                                                |
| ATGGAGAAACGAAGTACTACTATTCTTCTAGCCCTAGTCCTCTTCATCGTATCCGGAGTTGC<br>CAACGCACAGCAGTGCGGAAGGCAAAGGGGCGGAGCCTTATGCGGCGGAAACTTATGTTGCAG<br>CCAATTTGGATGGTGTGGATCGACACCCGAATACTGTTACCTAGCCAAGGTTGCCAGAGCCAA<br>TGCAGTGGAAGTGGTCCGACTCCAGAAGGAAGCGCGCAAAATGTACGTGCAACGTATCATTTGT<br>ATAACCCGCAGAATGTTGGTTGGGACTTGAATGCTGTTAGTGCTTATTGCTCGACATGGGATGC<br>TAATAAGCCTTTGGCTTGGAGGAGTAAGTATGGTTGGACTGCTTTCTGTGGTCCTGTTGGACCTC<br>GTGGTCAAGCCTCCTGTGGCAAGTGCTTAAGGGTCACAAACAGACGAACCAGAGCTCAAACAA<br>CGGTGAGAATCGTGGATCAATGCAGCAACGGTGGACTAGACTTGGACATTAACGTTTTCCGGCA<br>AATCGACACAGACGGAGTGGGAAATCAACAAGGTCACCTTATGGTGGACTACCAATTTGTTAAT<br>TGCGGTGACAATGTGAATGTTCTCTCTTGTCTGTAGTTGACACACAATGA |
| <b><i>CaChiVI4 (CA12g08860)</i></b>                                                                                                                                                                                                                                                                                                                                                                                                                                                                                                                                                                                                                                                |
| ATGTCATATATAAGCAATTACCCTATATTCCATAGAGAGAAAAAAGTAATAACAAAAACGATG<br>AGATTTTCATTAGCTCTTGTCTTTGTGATTTTGGCCCTGTTGCTAACTACTACTTATGCAGAACAA<br>TGTGGTAGACAAAACCATAAGCGTAAGTGTCCCAACAAGCTGTGTTGCAGCAAGTTTGGATGGT<br>GTGGCACTAGTTGTGACTACTGTGGAGCTGGCTGCCAGAGAACTGTAACAAAGGTTGCGCCAC<br>TACCATGTTTCGCCAATGAAACCGTCAACAATAGTGGCGAACACTTGGATGGTGGTAACCTAAAC<br>TGA                                                                                                                                                                                                                                                                                                                           |

**Table S2. Primer pairs for qRT-PCR**

| Gene name        | Primer sequence (5'→3')                                 | Product length/AN |
|------------------|---------------------------------------------------------|-------------------|
| <i>CaChiI1</i>   | F: AAACCTCCCATGAAACTACCG<br>R: GTTTAAAAGGTCAACTCCGATGG  | 227               |
| <i>CaChiI2</i>   | F: GTTTAAAAGGTCAACTCCGATGG<br>R: CAGCATTGATGAAGGCATTGT  | 116               |
| <i>CaChiI3</i>   | F: CTATTTGCTCTCTTATTGCTGATGG<br>R: CAGGACCACAATAGGCATCG | 133               |
| <i>CaChiIII1</i> | F: TCTTCCCTTTCATCTTCCAACC<br>R: AGTTTGTTCTCCGCATCGTC    | 229               |
| <i>CaChiIII2</i> | F: CTCCACCTCCACCTAATTTC<br>R: CCACACCAACCCCATCTAC       | 100               |
| <i>CaChiIII3</i> | F: TGGTGCGGAACCTACAGAAAAG<br>R: TTCTACCATCAGCTTGCCTTC   | 127               |
| <i>CaChiIII4</i> | F: GGAATGCAAGCTGATGGTAGA                                | 110               |

|                     |                                                           |                |
|---------------------|-----------------------------------------------------------|----------------|
|                     | R: CTCTGACTTTGACACCACTCTT                                 |                |
| <i>CaChiIII5</i>    | F: GAAAGCAAGCTGCTGGTAGA<br>R: TGA CTTTGACAGTAGGGAGAAC     | 106            |
| <i>CaChiIII6</i>    | F: GTCCTAGTGAAGAGTGTTGTAGTT<br>R: CGCATAAACCTGGCTCTTCT    | 114            |
| <i>CaChiIII7</i>    | F: TCAGCCAAAACATCTCTTCCC<br>R: CATCAGGGCATTCTCTACCAC      | 121            |
| <i>CaChiIV1</i>     | F: TCTTTGCTCATGTCACCCAC<br>R: ATCTCTTGCAACTATGTCAGGG      | 227            |
| <i>CaChiIV2</i>     | F: TCAAGTGCTATCCTGAATTCGG<br>R: CTTTCCAGAGACACAAGGGTAC    | 182            |
| <i>CaChiVI1</i>     | F: CAATACGGGTTCTGTGGTACG<br>R: CAACATTTTCAGCTTCGCCAG      | 103            |
| <i>CaChiVI2</i>     | F: TGGGACTTGAATGCGGTTAG<br>R: TCACTATCGTCTGAGCTCCTG       | 178            |
| <i>CaChiVI3</i>     | F: CGACATGGGATGCTAATAAGCC<br>R: CGTTGTTTGAGCTCTGGTTCG     | 143            |
| <i>CaChiVI4</i>     | F: GTCTTTGTGATTTTGGCCCTG<br>R: TTGGCGAACATGGTAGTGG        | 191            |
| <i>CaPR1</i>        | F: TGGAGACTGCAGGATGCAACACT<br>R: TACCACCCATTGTTGCACCGAAC  | AF053343.2     |
| <i>CaPO1</i>        | F: CCCTTCAATCGACGCATCCTTTC<br>R: CCAAGAAATCCCCTGAGCCCTA   | AF442386.1     |
| <i>CaDEF1</i>       | F: CAAGGGAGTATGTGCTAGTGAGAC<br>R: TGCACAGCACTATCATTGCATAC | AF442388.1     |
| <i>CaPO2</i>        | F: TGATTGCTTTGTTCAAGGGTT<br>R: ATGATGGACCTCCAACGAGA       | DQ489711.1     |
| <i>CaAP2/ERF064</i> | F: CAACTCCTTCTTCTTGCTCTTC<br>R: CGCCTCCTAACACCTCGGTA      | XM_016712649.1 |
| <i>CaBPR1</i>       | F: CTGGTGCCGTGAAGATGTGGGT<br>R: TACCACCCATTGTTGCACCGAA    | AF053343       |
| <i>CaASMT1</i>      | F: GAGACACCCTCTATGGACTTAC<br>R: TGAGAATTGGATTGTTTTGG      | CA09g13730     |
| <i>CaSNAT1</i>      | F: GAGGGTAATGCAGAAAAGAA<br>R: ATGGGAAGGATCAACAAGAA        | CA10g10570     |
| <i>CaSNAT2</i>      | F: TTGGGATGTGGTTGTGG<br>R: CGGGGCTCCGAATAAA               | CA11g02340     |
| <i>CaMPK3</i>       | F: GAAGGGAGTTTTCTGATGTTT<br>R: ATGTATTTTAGCCACGGA         | CA06g06270     |
| <i>CaMPK6</i>       | F: ATCCCAGAAGGAGAATAACAG<br>R: CAAGAAAACACCTGGACACT       | CA03g14570     |
| <i>CaCAT1</i>       | F: GTTGGTCGCTTGGTATTGA<br>R: TTGGGAGCGTTAGGTGG            | CA04g22770     |
| <i>CaAPX1</i>       | F: CAAGGAGCGTTCTGGTTT<br>R: CTGATGGCAACTGTAAAAGCCCTTC     | CA06g06240     |
| <i>CaICS1</i>       | F: TGCTTTTGGCTCATTTTATT<br>R: TCATCTATTGCCCTCTGGTAT       | CA06g19210     |

F: Forward primer

R: Reverse primer

**Table S3. Primer pairs for knockdown of *CaChiIII2* and *CaPDS***

| Primer Name      | Primer sequence (5'→3')               | Enzymes      |
|------------------|---------------------------------------|--------------|
| <i>CaChiIII2</i> | F: CCGGAATTCAGATGGTCAGAGTCAATGTCCA    | <i>EcoRI</i> |
|                  | R: CCGCTCGAGCAGAGACACTACAACACACTCC    | <i>XhoI</i>  |
| <i>CaPDS</i>     | F: GGGGAATTCGTGTGTCAAACTCCAAGGTCTGTA  | <i>EcoRI</i> |
|                  | R: GGGGGATCCTTTCTCCCACCTTGGTTCACCTTGT | <i>BamHI</i> |

**Table S4. Primer pairs for transformation of *CaChiIII2***

| Primer Name      | Primer sequence (5'→3')            | Enzymes     |
|------------------|------------------------------------|-------------|
| <i>CaChiIII2</i> | F: GCTCTAGACCTAATGGAGTTTGTGTAGTATC | <i>XbaI</i> |
|                  | R: GGGGTACCGAAGCTTCCAAGACCTCC      | <i>KpnI</i> |

**Table S5. Primer pairs for subcellular localization of *CaChiIII2***

| Primer Name      | Primer sequence (5'→3')            | Enzymes     |
|------------------|------------------------------------|-------------|
| <i>CaChiIII2</i> | F: GCTCTAGACCTAATGGAGTTTGTGTAGTATC | <i>XbaI</i> |
|                  | R: GGGGTACCGAAGCTTCCAAGACCTCC      | <i>KpnI</i> |
