# Supplementary material for: Melatonin Mitigates the Infection of Colletotrichum gloeosporioides via Modulation of the Chitinase Gene and Antioxidant Activity in Capsicum annuum L
Source: MDPI journal article supplement (doi:10.3390/antiox10010007), 2020-12-23
Supplement: s1 [file s1]

# Melatonin Mitigates the Infection of *Colletotrichum gloeosporioides* via Modulation of the Chitinase Gene and Antioxidant Activity in *Capsicum annuum* L.

Muhammad Ali <sup>1,2</sup>, Anthony Tumbek Lamin-Samu <sup>1</sup>, Izhar Muhammad <sup>3</sup>, Mohamed Farghal <sup>1</sup>, Abdul Mateen Khattak <sup>4</sup>, Ibadullah Jan <sup>5</sup>, Saeed ul Haq <sup>4</sup>, Abid Khan <sup>6</sup>, Zhen-Hui Gong <sup>2,\*</sup> and Gang Lu <sup>1,\*</sup>

<sup>1</sup> Department of Horticulture, College of Agriculture and Biotechnology, Zhejiang University, Hangzhou 310058, China; alinhorti@yahoo.com (M.A.); anthonylaminsamu@yahoo.com (A.T.L.-S.); mohamedfa2016@gmail.com (M.F.)

<sup>2</sup> College of Horticulture, Northwest A&F University, Yangling 712100, China

<sup>3</sup> College of Agronomy, Northwest A&F University, Yangling 712100, China; izeyaar@gmail.com

<sup>4</sup> Department of Horticulture, The University of Agriculture, Peshawar, Pakistan; mateen@aup.edu.pk (A.M.K.); saeed\_ulhaq@nwsuaf.edu.cn (S.u.H.)

<sup>5</sup> Department of Agriculture, University of Swabi, Khyber Pakhtunkhwa, Pakistan; dribad@uoswabi.edu.pk

<sup>6</sup> Department of Horticulture, The University of Haripur, Haripur 22620, Pakistan; abidagriculturist@gmail.com

\* Correspondence: zhgong@nwsuaf.edu.cn (Z.-H.G.); glul@zju.edu.cn (G.L.)

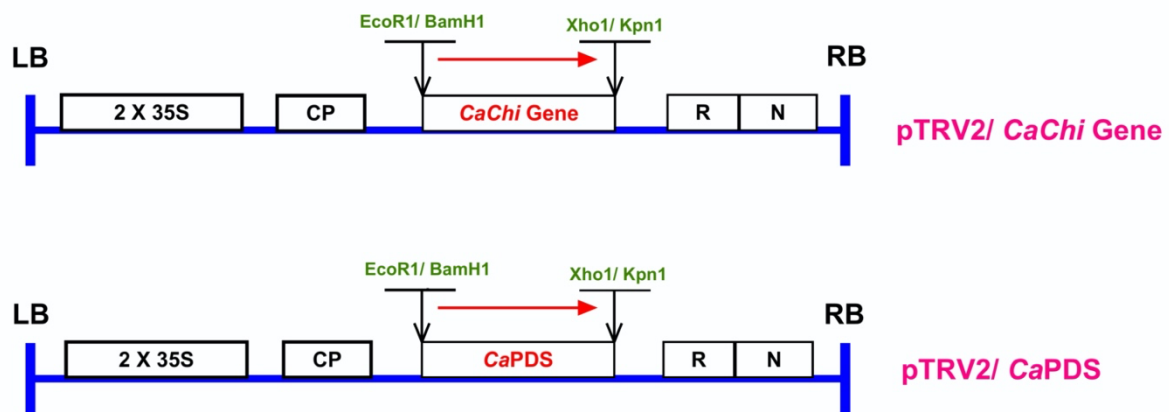

**Figure S1.** Virus induced gene silencing (VIGS) vector.

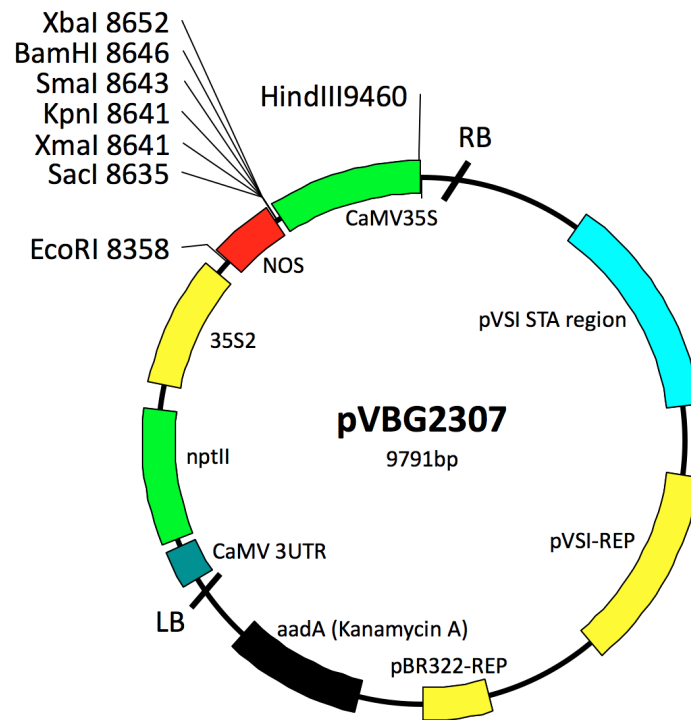

**Figure S2.** Overexpression vector pVBG2307.

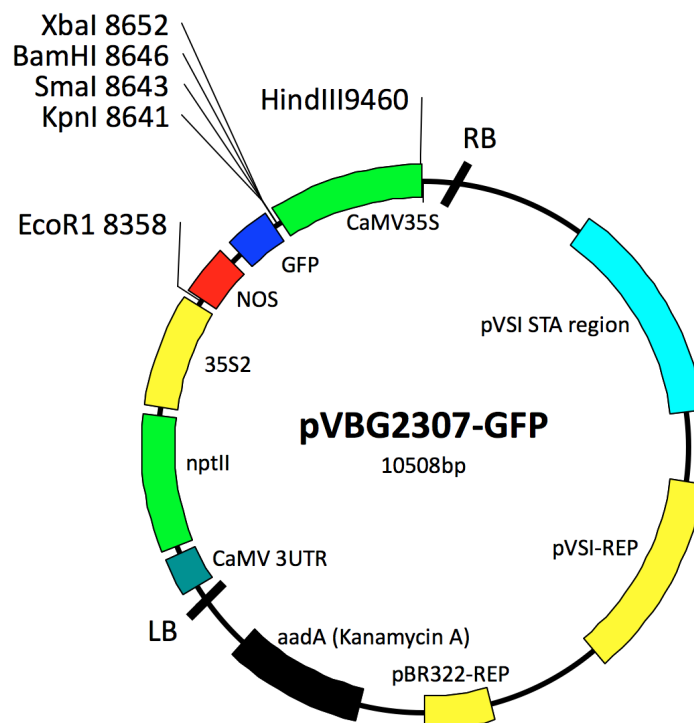

**Figure S3.** Subcellular localization vector pVBG2307-GFP

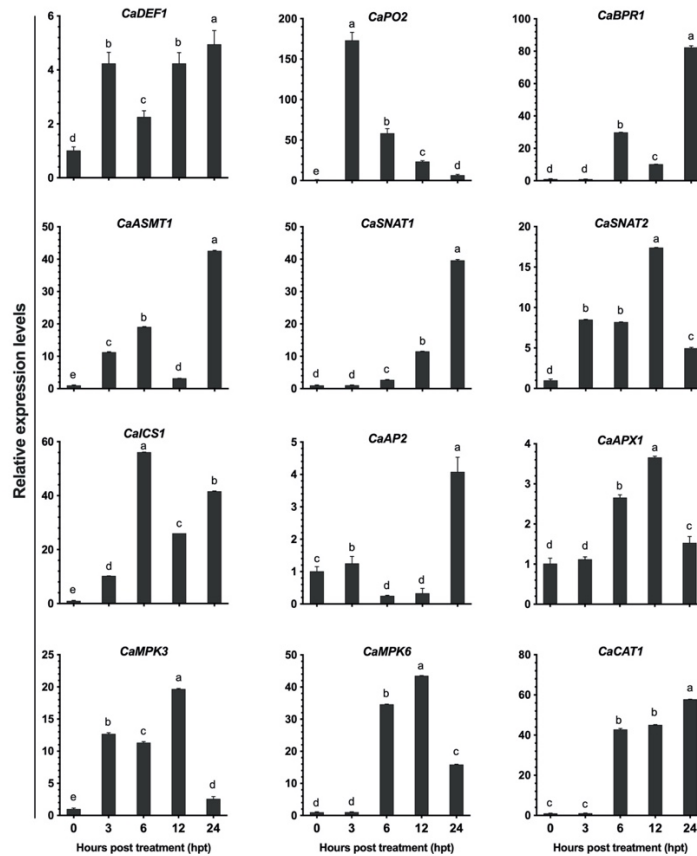

**Figure S4.** Effect of exogenous melatonin application on the expression levels of different genes. Tissues samples were taken at different intervals (0, 3, 6, 12, and 24-hours post-treatment) and were observed through qRT-PCR. The mean values  $\pm$  SDs of 3 replications are given. Lower case letters (a–f) on each histogram show the respective differences at  $P \leq 0.05$  using the DMR test.

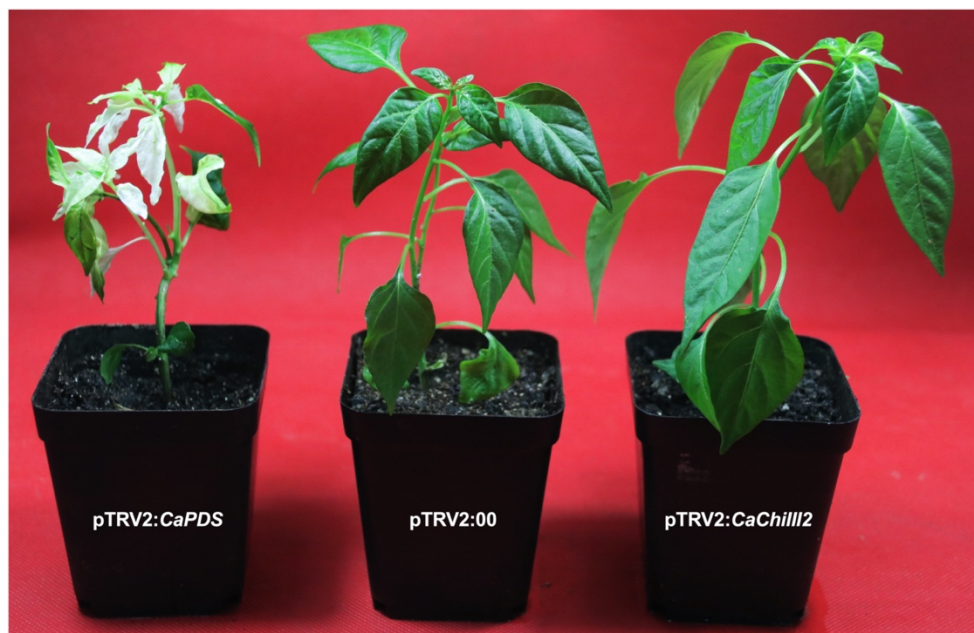

**Figure S5.** Representative phenotypes of pTRV2:*CaPDS* (positive control), pTRV2:00 (negative control) and pTRV2:*CaChIII2* (*CaChIII2*-silenced)
